# Supplementary material for: Awareness of, practical experience in, and education need for health advocacy in Japan: a preliminary study among physicians in Japan
Source: Research Square preprint supplement (doi:10.21203/rs.3.rs-5687988/v1), 2024-12-26
Supplement: Supplementary file 1 [file 18f42d72d851ef174dc7e0b9.docx]

Additional file 1

**Questionnaire Survey on Social Support among Healthcare Professionals**

The purpose of this survey is to inquire about social support practice among physicians. Our laboratory considers the social support undertaken by healthcare professionals as “**health advocacy**” and is conducting research to examine strategies to disseminate it effectively in the future in Japan. To elucidate preliminary evidence, **we aim to clarify Japanese physicians’ awareness of, actual practical experience in, and education need for health advocacy.**

Social support performed by healthcare professionals, such as individual healthcare support ((A) as below) or organizational and systemic social environment improvements ((B) and (C) as below), to ensure that fundamental rights of people are properly exercised.

What is Health Advocacy?

(A) Linking patients to social resources or support services’ contacts in the community.

Examples: Linking patients to administrative contacts.

Introducing local support groups or patient advocacy groups.

(B) Developing new social support resources in the community.

Examples: Establishing a cafeteria for children in poverty.

Developing a community network to support people with disabilities.

(C) Working for changes in local ordinances or national laws, policies, and systems.

Examples: Suggesting the introduction of a partnership system to local governments in terms of improving health care for sexual minority people.

Three specific action levels of health advocacy and examples of practices

As health advocacy is widely practiced by healthcare professionals, these changes could be expected to enhance social support and improve environments for minority groups or those who face difficulties as a result of such as their economic status, working environment, family or educational environment, status as a sexual or racial minority, or disability, etc.

The survey takes approximately 10 minutes to complete.

*Do you agree to answer this questionnaire?

Yes ( ) → Please answer the following questions.

No ( ) → Please dispose of this form by shredding.

Basic information

☆Please indicate your age. ( years old)

☆Please indicate your number of years of experience as a physician. ( years)

☆ Please indicate the percentage of your work that is allocated to primary care. ( %)

☆ Please indicate the type of medical institution you belong to and the number of beds.

□ Hospital ( beds)

□ Clinic ( beds)

☆Please indicate the city where your medical institution is located. ( )

I. Awareness of the need for health advocacy

1-1. Have you ever felt the need to link your patient to some kind of social resources or support services’ contacts because you consider the patient to be having social difficulties?

(1) Have felt the need (2) Have not felt the need

1-2. For respondents who answered “(1) Have felt the need.”:

What was the situation? (multiple answers allowed)

(1) Poverty (2) Unemployment (3) Working environment (4) Stress

(5) Physical/mental/intellectual disabilities (6) Single-parent family

(7) Stunted growth (8) School refusal (9) Education environment

(10) Domestic violence (11) Housing environment (12) Living alone

(13) Lack of informal nursing care (14) Isolation in the community (15) Racial minority

(16) Sexual minority (17) Addiction (18) Malnutrition/undernourishment

(19) Lack/absence of transportation (20) Others ( )

2-1. Have you ever felt the need to develop new social support resources in the community to support your patients or people with social difficulties similar to those of your patients?

(1) Have felt the need (2) Have not felt the need

2-2. For respondents who answered “(1) Have felt the need.”:

What was the situation? (multiple answers allowed)

(1) Poverty (2) Unemployment (3) Working environment (4) Stress

(5) Physical/mental/intellectual disabilities (6) Single-parent family

(7) Stunted growth (8) School refusal (9) Education environment

(10) Domestic violence (11) Housing environment (12) Living alone

(13) Lack of informal nursing care (14) Isolation in the community (15) Racial minority

(16) Sexual minority (17) Addiction (18) Malnutrition/undernourishment

(19) Lack/absence of transportation (20) Others ( )

3-1. Have you ever felt the need to work for changes in local ordinances or national laws, policies, and systems to support your patients or people with social difficulties similar to those of your patients?

(1) Have felt the need (2) Have not felt the need

3-2. For respondents who answered “(1) Have felt the need.”:

What was the situation? (multiple answers allowed)

(1) Poverty (2) Unemployment (3) Working environment (4) Stress

(5) Physical/mental/intellectual disabilities (6) Single-parent family

(7) Stunted growth (8) School refusal (9) Education environment

(10) Domestic violence (11) Housing environment (12) Living alone

(13) Lack of informal nursing care (14) Isolation in the community (15) Racial minority

(16) Sexual minority (17) Addiction (18) Malnutrition/undernourishment

(19) Lack/absence of transportation (20) Others ( )

II. Actual practice experience in health advocacy

4-1. Have you ever actually linked your patient to some kind of social resources or support services’ contacts because you considered the patient to be having social difficulties?

(1) Have linked (2) Have not linked

4-2. For respondents who answered “(1) Have linked.”:

What were the social resources or support services’ contacts?

5-1. Have you ever actually developed new social support resources in the community to support your patients or people with social difficulties similar to those of your patients?

(1) Have developed (2) Have not developed

5-2. For respondents who answered “(1) Have developed.”:

What were and how did you develop the social support resources in the community?

6-1. Have you ever actually worked for changes in local ordinances or national laws, policies, and systems to support your patients or people with social difficulties similar to those of your patients?

(1) Have worked (2) Have not worked

6-2. For respondents who answered “(1) Have worked.”:

What were and how did you work for changes in local ordinances or national laws, policies, and systems?

III. Recognition of health advocacy

7. Have you ever heard of the term “health advocacy”?

(1) Have heard of (2) Have not heard of

8. Do you think that “health advocacy” is the responsibility of healthcare professionals?

(1) Yes (2) No

IV. Clues for future dissemination strategies for health advocacy

9. What do you think is required to disseminate health advocacy by healthcare professionals in Japan? (multiple answers allowed)

(1) Undergraduate medical education (e.g., lectures, practical training at universities)

(2) Lifelong medical education (e.g., lectures, seminars, workshops)

(3) Places or networks for information exchange among health advocacy practitioners

(4) Policy support for health advocacy actions

(5) Others ( )

10. If lifelong medical education regarding health advocacy were offered for healthcare professionals in the future, would you want to participate?

(1) Want to participate (2) Do not want to participate
